# Supplementary material for: A Review of Health Risks and Pathways for Exposure to Wastewater Use in Agriculture
Source: PubMed Central journal article supplement (PMC4937861; doi:10.1289/ehp.1509995), 2016-01-29
Supplement: ehp.1509995.s001.acco.pdf [file ehp.1509995.s001.acco.pdf]

**Note to readers with disabilities:** *EHP* strives to ensure that all journal content is accessible to all readers. However, some figures and Supplemental Material published in *EHP* articles may not conform to [508 standards](#) due to the complexity of the information being presented. If you need assistance accessing journal content, please contact [ehp508@niehs.nih.gov](mailto:ehp508@niehs.nih.gov). Our staff will work with you to assess and meet your accessibility needs within 3 working days.

## **Supplemental Material**

# **A Review of Health Risks and Pathways for Exposure to Wastewater Use in Agriculture**

Sarah K. Dickin, Corinne J. Schuster-Wallace, Manzoor Qadir, and Katherine Pizzacalla

### **Table of Contents**

**Table S1.** Description of studies using indirect methods to assess health risks

**Table S2.** Description of crop contamination studies

**Table S1.** Description of studies using indirect methods to assess health risks

|    | <b>Citation</b>                | <b>Region</b>           | <b>Country</b>                   | <b>Types of exposure<sup>a</sup></b> | <b>Type of exposure pathway<sup>b</sup></b> |
|----|--------------------------------|-------------------------|----------------------------------|--------------------------------------|---------------------------------------------|
| 1  | Agunwamba, 2001                | Africa                  | Nigeria                          | Biological, Vector-borne             | 1,2,9                                       |
| 2  | Aiello et al., 2013            | Europe                  | Italy                            | Biological                           | 1                                           |
| 3  | An et al., 2007                | Asia                    | Korea                            | Biological                           | 2, 4                                        |
| 4  | Ayuso-Gabella et al., 2011     | Australia, MENA, Europe | Australia, Israel, Spain, Italy  | Biological                           | 1,2,5                                       |
| 5  | Barker et al., 2013            | Australia               | Australia                        | Biological                           | 1,2,9                                       |
| 6  | Bastos et al., 2008            | Latin America           | Brazil                           | Biological                           | 1                                           |
| 7  | Carlander et al., 2009         | Europe                  | Greece, Sweden, northern Ireland | Biological                           | 2,4,5,8, 10, 11                             |
| 8  | Diallo et al., 2008            | Asia                    | Thailand                         | Biological                           | 1, 2, 4, 11                                 |
| 9  | Downs et al., 1999             | Latin America           | Mexico                           | Inorganic, biological, organic       | 10                                          |
| 10 | Ferrer et al., 2012            | Asia                    | Thailand                         | Biological                           | 1,2, 11                                     |
| 11 | Forslund et al., 2010          | Europe                  | Serbia, Italy                    | Biological                           | 1,2                                         |
| 12 | Forslund et al., 2012          | Europe                  | Crete, Italy                     | Biological                           | 1,2                                         |
| 13 | Friedler et al., 2006          | MENA                    | Syria                            | No focus                             |                                             |
| 14 | Grangier et al., 2012          | MENA                    | Israel                           | Biological                           | 4                                           |
| 15 | Gupta et al., 2012             | Asia                    | India                            | Inorganic                            | 1                                           |
| 16 | Hamilton et al., 2006          | USA and Canada          | USA                              | Biological                           | 1                                           |
| 17 | Jan et al., 2010               | Asia                    | Pakistan                         | Inorganic                            | 1                                           |
| 18 | Jang et al., 2010              | Asia                    | Korea                            | Inorganic, biological, organic       | 1,2                                         |
| 19 | Keraita et al., 2008           | Africa                  | Ghana                            | Biological                           | 1,2                                         |
| 20 | Khan et al., 2013              | Asia                    | Pakistan                         | Inorganic                            | 1                                           |
| 21 | Khan et al., 2008              | Asia                    | China                            | Inorganic                            | 1                                           |
| 22 | Lente et al., 2012             | Africa                  | Ghana                            | Inorganic                            | 1                                           |
| 23 | Lim and Jiang, 2013            | USA and Canada          | USA                              | Biological                           | 1                                           |
| 24 | Mahmood and Malik, 2013        | Asia                    | Pakistan                         | Inorganic                            | 1                                           |
| 25 | Mapanda et al., 2007           | Africa                  | Zimbabwe                         | Inorganic                            | 1                                           |
| 26 | Mara et al., 2007              | Latin America           | Mexico                           | Biological                           | 1,2,4                                       |
| 27 | Mojid et al., 2010             | Asia                    | Bangladesh                       | Inorganic and biological             | 2                                           |
| 28 | Moradmand and Harchegani, 2011 | MENA                    | Iran                             | Inorganic                            | 1                                           |
| 29 | Mukhtar et al., 2006           | Asia                    | Pakistan                         | Vector-borne                         | 9                                           |
| 30 | Mukhtar et al., 2003           | Asia                    | Pakistan                         | Vector-borne                         | 9                                           |
| 31 | Munoz et al., 2010             | Europe                  | Spain                            | Biological, organic                  | 1                                           |
| 32 | Mutengu et al., 2007           | Africa                  | Zimbabwe                         | Inorganic and biological             | 1,2                                         |
| 33 | Nabulo et al., 2010            | Africa                  | Uganda                           | Inorganic                            | 1                                           |
| 34 | Navarro and Jimenez, 2011      | Latin America           | Mexico                           | Biological                           | 1                                           |
| 35 | Pandey et al., 2012            | Asia                    | India                            | Inorganic                            | 1                                           |
| 36 | Petterson and Ashbolt, 2001    | USA and Canada          | USA                              | Biological                           | 1                                           |

|    |                            |                   |          |                       |         |
|----|----------------------------|-------------------|----------|-----------------------|---------|
| 37 | Petterson et al., 2001     | None              | None     | Biological            | 1       |
| 38 | Ramadan and Mandil, 2009   | MENA              | Syria    | Inorganic             | 1       |
| 39 | Rutkowski et al., 2007     | Asia              | Nepal    | Biological            | 2       |
| 40 | Shuval et al., 1997        | None              | None     | Biological            | 1       |
| 41 | Silverman et al., 2013     | Africa            | Ghana    | Biological            |         |
| 42 | Singh et al., 2010         | Asia              | India    | Inorganic             | 1       |
| 43 | Srinivasan and Reddy, 2009 | Asia              | India    | Inorganic, biological | 1,2     |
| 44 | Tang et al., 2011          | Asia              | China    | Inorganic             | 1       |
| 45 | Wang et al., 2013 a        | Asia              | China    | Inorganic             | 1       |
| 46 | Wang et al., 2012a         | AsiaLatin America | China    | Organic               | 1       |
| 47 | Wang et al., 2013b         | Asia              | China    | Inorganic             | 1       |
| 48 | Wang et al., 2012b         | Asia              | China    | Inorganic             | 1       |
| 49 | Wang et al., 2012c         | Asia              | China    | Inorganic             | 1       |
| 50 | Wedesilassie et al., 2011  | Africa            | Ethiopia | Biological            | 1,2,7   |
| 51 | Wu et al., 2013            | None              | None     | Organic               | 1       |
| 52 | Yang et al., 2006          | Asia              | China    | Inorganic             | 1,2,4,6 |
| 53 | Zhang et al., 2013         | Asia              | China    | Organic               | 1,2,5,8 |

<sup>a</sup>Contaminant types were divided into three groups comprising inorganic chemicals such as heavy metals, organic chemicals such as persistent organic pollutants, plasticizers and pharmaceuticals, and microbiological contaminants including bacterial, viral, protozoan, and helminthic pathogens. Exposure to vector-borne disease, associated with mosquito breeding in wastewater is also noted. A few studies that mention no specific focus, such as 'wastewater contaminants' are noted as such.

<sup>b</sup>Codes for exposure pathways: 1 = Consumed crops; 2 = Farmer occupational; 3 = Farmer's family occupational; 4 = Children playing in irrigated area; 5 = Aerosols or inhalation of soil particles; 6 = Milk/mean from irrigated fodder; 7 = Water, sanitation, hygiene; 8 = People living in contaminated area, e.g. commuting, recreation; 9 = Vectors breeding in wastewater; 10 = Consumption of contaminated groundwater; 11 = Contact with surface water/swimming; 12 = Animal husbandry/contact with animals

**Table S2.** Description of crop contamination studies

|    | <b>Citation</b>                | <b>Region</b>                 | <b>Country</b>                 | <b>Types of exposure<sup>a</sup></b> | <b>Type of exposure pathway<sup>b</sup></b> |
|----|--------------------------------|-------------------------------|--------------------------------|--------------------------------------|---------------------------------------------|
| 1  | Abdu et al., 2011              | Africa                        | Nigeria, Burkina Faso and Mali | Inorganic                            | 1                                           |
| 2  | Achakzai and Bazai, 2006       | Asia                          | Pakistan                       | Inorganic                            | 1                                           |
| 3  | Agbenin et al., 2009           | Africa                        | Nigeria                        | Inorganic                            | 1                                           |
| 4  | Ahmad and Goni, 2010           | Asia                          | Bangladesh                     | Inorganic                            | 1                                           |
| 5  | Akponikpè et al., 2011         | Africa                        | Burkina Faso                   | Biological                           | 1                                           |
| 6  | Al-Sa'ed, 2007                 | MENA                          | Palestine                      | Biological                           | 1, 4, 8                                     |
| 7  | Amoah et al., 2006             | Africa                        | Ghana                          | Biological and organic               | 1                                           |
| 8  | Anh et al., 2007a              | Asia                          | Cambodia                       | Biological                           | 1                                           |
| 9  | Arora et al., 2008             | Asia                          | India                          | Inorganic                            | 1                                           |
| 10 | Assadian et al., 2005          | USA and Canada                | USA                            | Biological                           | 1                                           |
| 11 | Assadian et al., 1998          | USA and Canada, Latin America | USA, Mexico                    | Inorganic                            | 1                                           |
| 12 | Avci, 2012                     | Europe                        | Turkey                         | Inorganic                            | 1                                           |
| 13 | Avci and Deveci, 2013          | Europe                        | Turkey                         | Inorganic                            | 1                                           |
| 14 | Aziz et al., 1996              | Asia                          | India                          | Inorganic and organic                | 1                                           |
| 15 | Bastos and Mara, 1995          | Europe                        | Portugal, England              | Biological                           | 1                                           |
| 16 | Bichai et al., 2012            | Europe                        | Spain                          | Biological                           | 1                                           |
| 17 | Calderon-Preciado et al., 2013 | Europe                        | Spain                          | Organic                              | 1                                           |
| 18 | Castro et al., 2013            | Europe                        | Spain                          | Biological and inorganic             | 1                                           |
| 19 | Choi et al., 2004              | USA and Canada                | USA                            | Biological                           | 1                                           |
| 20 | Dodgen et al., 2013            | No focus                      | No focus                       | No focus                             | 1                                           |
| 21 | Duan et al., 2010              | Asia                          | Pakistan                       | Inorganic                            | 1                                           |
| 22 | Ensink et al., 2007            | Asia                          | China                          | Biological                           | 1                                           |
| 23 | Farahat and Linderholm, 2013   | MENA                          | Egypt                          | Inorganic                            | 1,6                                         |
| 24 | Fasciolo et al., 2002          | Latin America                 | Argentina                      | Biological                           | 1                                           |
| 25 | Gemmell and Schmidt, 2012      | Africa                        | South Africa                   | Biological                           | 1                                           |
| 26 | Gupta et al., 2008             | Asia                          | India                          | Inorganic                            | 1                                           |
| 27 | Gupta et al., 2009             | Asia                          | India                          | Biological                           | 1,2                                         |
| 28 | Kalavrouziotis et al., 2008    | Europe                        | Greece                         | Inorganic and biological             | 1                                           |
| 29 | Kang et al., 2007              | Asia                          | Korea                          | Inorganic                            | 1                                           |
| 30 | Khai et al., 2007              | Asia                          | Vietnam                        | Inorganic                            | 1                                           |
| 31 | Sardar Khan et al., 2008       | Asia                          | China                          | Inorganic and organic                | 1                                           |
| 32 | Manas et al., 2009             | Europe                        | Spain                          | Inorganic and biological             | 1                                           |
| 33 | Manios et al., 2006            | Europe                        | Greece                         | Biological                           | 1                                           |
| 34 | Melloul et al., 2001           | MENA                          | Morocco                        | Biological                           | 1,2                                         |
| 35 | Mendoza-Espinosa et al., 2008  | Latin America                 | Mexico                         | Biological                           | 1                                           |

|    |                           |               |            |                          |     |
|----|---------------------------|---------------|------------|--------------------------|-----|
| 36 | Minhas et al., 2006       | Asia          | India      | Biological               | 1   |
| 37 | Mojid and Wyseure, 2013   | Asia          | Bangladesh | Inorganic and biological | 1   |
| 38 | Njenga et al., 2011       | Africa        | Kenya      | Inorganic and biological | 1   |
| 39 | Palacios et al., 2001     | Europe        | Spain      | Biological               | 6   |
| 40 | Palese et al., 2009       | Europe        | Italy      | Biological               | 1   |
| 41 | Papadopoulos et al., 2009 | Europe        | Greece     | Inorganic and biological | 1   |
| 42 | Pedrero and Alarcón, 2009 | Europe        | Spain      | Inorganic and biological | 1   |
| 43 | Pedrero et al., 2012      | Europe        | Spain      | Inorganic and biological | 1   |
| 44 | Peters and Ngai, 2004     | Asia          | Vietnam    | Biological               | 1,2 |
| 45 | Platzer et al., 2004      | Latin America | Nicaragua  | Biological               | 1,2 |
| 46 | Qadir et al., 2000        | Asia          | Pakistan   | Inorganic                | 1   |
| 47 | Rusan et al., 2007        | MENA          | Jordan     | Inorganic                | 6   |
| 48 | Sharma et al., 2007       | Asia          | India      | Inorganic                | 1   |
| 49 | Tai et al., 2013          | Asia          | China      | Inorganic                | 1   |
| 50 | Wang et al., 2003         | Asia          | China      | Inorganic                | 1   |

<sup>a</sup>Contaminant types were divided into three groups comprising inorganic chemicals such as heavy metals, organic chemicals such as persistent organic pollutants, plasticizers and pharmaceuticals, and microbiological contaminants including bacterial, viral, protozoan, and helminthic pathogens. Exposure to vector-borne disease, associated with mosquito breeding in wastewater is also noted. A few studies that mention no specific focus, such as 'wastewater contaminants' are noted as such.

<sup>b</sup>Codes for exposure pathways: 1 = Consumed crops; 2 = Farmer occupational; 3 = Farmer's family occupational; 4 = Children playing in irrigated area; 5 = Aerosols or inhalation of soil particles; 6 = Milk/mean from irrigated fodder; 7 = Water, sanitation, hygiene; 8 = People living in contaminated area, e.g. commuting, recreation; 9 = Vectors breeding in wastewater; 10 = Consumption of contaminated groundwater; 11 = Contact with surface water/swimming; 12 = Animal husbandry/contact with animals.

## References

- Abdu N, Abdulkadir A, Agbenin JO, Buerkert A. 2011. Vertical distribution of heavy metals in wastewater-irrigated vegetable garden soils of three West African cities. *Nutr. Cycl. Agroecosystems* 89:387–397; doi:10.1007/s10705-010-9403-3.
- Achakzai AKK, Bazai ZA. 2006. Phytoaccumulation of heavy metals in spinach (*Spinacea oleraceac L.*) irrigated with wastewater of Quetta City. *J. Chem. Soc. Pakistan* 28: 473–477.
- Agbenin JO, Danko M, Welp G. 2009. Soil and vegetable compositional relationships of eight potentially toxic metals in urban garden fields from northern Nigeria. *J. Sci. Food Agric.* 89:49–54; doi:10.1002/jsfa.3409.
- Agunwamba JC. 2001. Analysis of socioeconomic and environmental impacts of waste stabilization pond and unrestricted wastewater irrigation: Interface with maintenance. *Environ. Manage.* 27:463–476; doi:10.1007/s002670010162.
- Ahmad JU, Goni MA. 2010. Heavy metal contamination in water, soil, and vegetables of the industrial areas in Dhaka, Bangladesh. *Environ. Monit. Assess.* 166:347–357; doi:10.1007/s10661-009-1006-6.
- Aiello R, Cirelli GL, Consoli S, Licciardello F, Toscano A. 2013. Risk assessment of treated municipal wastewater reuse in Sicily. *Water Sci. Technol.* 67:89–98; doi:10.2166/wst.2012.535.
- Akponikpè PBI, Wima K, Yacouba H, Mermoud A. 2011. Reuse of domestic wastewater treated in macrophyte ponds to irrigate tomato and eggplant in semi-arid West-Africa: Benefits and risks. *Agric. Water Manag.* 98:834–840; doi:http://dx.doi.org/10.1016/j.agwat.2010.12.009.
- Al-Sa'ed R. 2007. Pathogens assessment in reclaimed effluent used for industrial crops irrigation. *Int J Env. Res Public Heal.* 4: 68–75.
- Amoah P, Drechsel P, Abaidoo RC, Ntow WJ. 2006. Pesticide and pathogen contamination of vegetables in Ghana's urban markets. *Arch. Environ. Contam. Toxicol.* 50:1–6; doi:10.1007/s00244-004-0054-8.
- An YJ, Yoon CG, Jung KW, Ham JH. 2007. Estimating the microbial risk of E-coli in reclaimed wastewater irrigation on paddy field. *Environ. Monit. Assess.* 129:53–60; doi:10.1007/s10661-006-9425-0.
- Anh VT, Tram NT, Klank LT, Cam PD, Dalsgaard A. 2007. Faecal and protozoan parasite contamination of water spinach (*Ipomoea aquatica*) cultivated in urban wastewater in Phnom Penh, Cambodia. *Trop. Med. Int. Heal.* 12:73–81; doi:10.1111/j.1365-3156.2007.01944.x.
- Arora M, Kiran B, Rani S, Rani A, Kaur B, Mittal N. 2008. Heavy metal accumulation in vegetables irrigated with water from different sources. *Food Chem.* 111:811–815; doi:10.1016/j.foodchem.2008.04.049.
- Assadian NW, Di Giovanni GD, Enciso J, Iglesias J, Lindemann W. 2005. The transport of waterborne solutes and bacteriophage in soil subirrigated with a wastewater blend. *Agric. Ecosyst. Environ.* 111:279–291; doi:http://dx.doi.org/10.1016/j.agee.2005.05.010.
- Assadian NW, Esparza LC, Fenn LB, Ali AS, Miyamoto S, Figueroa U V, et al. 1998. Spatial variability of heavy metals in irrigated alfalfa fields in the upper Rio Grande River basin. *Agric. Water Manag.* 36:141–156; doi:http://dx.doi.org/10.1016/S0378-3774(97)00054-1.
- Avci H. 2012. Trace metals in vegetables grown with municipal and industrial wastewaters. *Toxicol. Environ. Chem.* 94:1125–1143; doi:10.1080/02772248.2012.691501.
- Avci H, Deveci T. 2013. Assessment of trace element concentrations in soil and plants from cropland irrigated with wastewater. *Ecotoxicol. Environ. Saf.* 98:283–291; doi:10.1016/j.ecoenv.2013.08.013.
- Ayuso-Gabella N, Page D, Masciopinto C, Aharoni A, Salgot M, Wintgens T. 2011. Quantifying the effect of Managed Aquifer Recharge on the microbiological human health risks of irrigating crops with recycled water. *Agric. Water Manag.* 99:93–102; doi:http://dx.doi.org/10.1016/j.agwat.2011.07.014.

- Aziz O, Inam A, Samiullah, Siddiqi RH. 1996. Long term effects of irrigation with petrochemical industry wastewater. *J. Environ. Sci. Heal. Part a-Environmental Sci. Eng. Toxic Hazard. Subst. Control* 31: 2595–2620.
- Barker SF, O’Toole J, Sinclair MI, Leder K, Malawaraarachchi M, Hamilton AJ. 2013. A probabilistic model of norovirus disease burden associated with greywater irrigation of home-produced lettuce in Melbourne, Australia. *Water Res.* 47:1421–1432; doi:10.1016/j.watres.2012.12.012.
- Bastos RK, Bevilacqua PD, Silva CA, Silva C V. 2008. Wastewater irrigation of salad crops: further evidence for the evaluation of the WHO guidelines. *Water Sci Technol* 57:1213–1219; doi:10.2166/wst.2008.244.
- Bastos RXX, Mara DD. 1995. The bacterial quality of salad crops drip and furrow irrigated with waste stabilization pond effluent: An evaluation of the who guidelines. *Water Sci. Technol.* 31:425–430; doi:http://dx.doi.org/10.1016/0273-1223(95)00529-V.
- Bichai F, Polo-López MI, Fernández Ibañez P. 2012. Solar disinfection of wastewater to reduce contamination of lettuce crops by *Escherichia coli* in reclaimed water irrigation. *Water Res.* 46:6040–6050; doi:http://dx.doi.org/10.1016/j.watres.2012.08.024.
- Calderon-Preciado D, Matamoros V, Save R, Munoz P, Biel C, Bayona JM. 2013. Uptake of microcontaminants by crops irrigated with reclaimed water and groundwater under real field greenhouse conditions. *Environ. Sci. Pollut. Res.* 20:3629–3638; doi:10.1007/s11356-013-1509-0.
- Carlander A, Schonning C, Stenstrom TA. 2009. Energy forest irrigated with wastewater: a comparative microbial risk assessment. *J Water Heal.* 7:413–433; doi:10.2166/wh.2009.020.
- Castro E, Manas P, De Las Heras J. 2013. EFFECTS OF WASTEWATER IRRIGATION IN SOIL PROPERTIES AND HORTICULTURAL CROP (*LACTUCA SATIVA L.*). *J. Plant Nutr.* 36:1659–1677; doi:10.1080/01904167.2013.805221.
- Choi C, Song I, Stine S, Pimentel J, Gerba C. 2004. Role of irrigation and wastewater reuse: comparison of subsurface irrigation and furrow irrigation. *Water Sci. Technol.* 50: 61–68.
- Diallo MBC, Anceno AJ, Tawatsupa B, Houpt ER, Wangsuphachart V, Shipin O V. 2008. Infection risk assessment of diarrhea-related pathogens in a tropical canal network. *Sci. Total Environ.* 407:223–232; doi:http://dx.doi.org/10.1016/j.scitotenv.2008.09.034.
- Dodgen LK, Li J, Parker D, Gan JJ. 2013. Uptake and accumulation of four PPCP/EDCs in two leafy vegetables. *Environ. Pollut.* 182:150–156; doi:10.1016/j.envpol.2013.06.038.
- Downs TJ, Cifuentes-Garcia E, Suffet IM. 1999. Risk screening for exposure to groundwater pollution in a wastewater irrigation district of the Mexico City region. *Environ. Health Perspect.* 107:553–561; doi:10.2307/3434397.
- Duan N, Wang XL, Liu XD, Lin C, Hou J. 2010. Effect of anaerobic fermentation residues on a chromium-contaminated soil-vegetable system. In *International Conference on Ecological Informatics and Ecosystem Conservation* (Z. Yang and B. Cheneds. ), Vol. 2 of *Procedia Environmental Sciences*, pp. 1585–1597.
- Ensink JHJ, Mahmood T, Dalsgaard A. 2007. Wastewater-irrigated vegetables: market handling versus irrigation water quality. *Trop. Med. Int. Heal.* 12:2–7; doi:10.1111/j.1365-3156.2007.01935.x.
- Farahat E, Linderholm HW. 2013. Effects of treated wastewater irrigation on size-structure, biochemical products and mineral content of native medicinal shrubs. *Ecol. Eng.* 60:235–241; doi:10.1016/j.ecoleng.2013.07.050.
- Fasciolo GE, Meca MI, Gabriel E, Morabito J. 2002. Effects on crops of irrigation with treated municipal wastewaters. *Water Sci Technol* 45: 133–138.
- Ferrer A, Nguyen-Viet H, Zinsstag J. 2012. Quantification of Diarrhea Risk Related to Wastewater Contact

in Thailand. *Ecohealth* 9:49–59; doi:10.1007/s10393-012-0746-x.

- Forslund A, Ensink JHJ, Battilani A, Kljujev I, Gola S, Raicevic V, et al. 2010. Faecal contamination and hygiene aspect associated with the use of treated wastewater and canal water for irrigation of potatoes (*Solanum tuberosum*). *Agric. Water Manag.* 98:440–450; doi:10.1016/j.agwat.2010.10.007.
- Forslund A, Ensink JHJ, Markussen B, Battilani A, Psarras G, Gola S, et al. 2012. *Escherichia coli* contamination and health aspects of soil and tomatoes (*Solanum lycopersicum* L.) subsurface drip irrigated with on-site treated domestic wastewater. *Water Res.* 46:5917–5934; doi:http://dx.doi.org/10.1016/j.watres.2012.08.011.
- Friedler E, Lahav O, Jizhaki H, Lahav T. 2006. Study of urban population attitudes towards various wastewater reuse options: Israel as a case study. *J. Environ. Manage.* 81:360–370; doi:10.1016/j.jenvman.2005.11.013.
- Gemmell ME, Schmidt S. 2012. Microbiological assessment of river water used for the irrigation of fresh produce in a sub-urban community in Sobantu, South Africa. *Food Res. Int.* 47:300–305; doi:http://dx.doi.org/10.1016/j.foodres.2011.07.016.
- Grangier C, Qadir M, Singh M. 2012. Health Implications for Children in Wastewater-Irrigated Peri-Urban Aleppo, Syria. *Water Qual. Expo. Heal.* 4:187–195; doi:10.1007/s12403-012-0078-7.
- Gupta N, Khan DK, Santra SC. 2008. An assessment of heavy metal contamination in vegetables grown in wastewater-irrigated areas of Titagarh, West Bengal, India. *Bull. Environ. Contam. Toxicol.* 80:115–118; doi:10.1007/s00128-007-9327-z.
- Gupta N, Khan DK, Santra SC. 2012. Heavy metal accumulation in vegetables grown in a long-term wastewater-irrigated agricultural land of tropical India. *Environ. Monit. Assess.* 184:6673–6682; doi:10.1007/s10661-011-2450-7.
- Gupta N, Khan DK, Santra SC. 2009. Prevalence of intestinal helminth eggs on vegetables grown in wastewater-irrigated areas of Titagarh, West Bengal, India. *Food Control* 20:942–945; doi:10.1016/j.foodcont.2009.02.003.
- Hamilton AJ, Stagnitti F, Premier R, Boland AM, Hale G. 2006. Quantitative microbial risk assessment models for consumption of raw vegetables irrigated with reclaimed water. *Appl. Environ. Microbiol.* 72:3284–3290; doi:10.1128/aem.72.5.3284-3290.2006.
- Jan FA, Ishaq M, Khan S, Ihsanullah I, Ahmad I, Shakirullah M. 2010. A comparative study of human health risks via consumption of food crops grown on wastewater irrigated soil (Peshawar) and relatively clean water irrigated soil (lower Dir). *J. Hazard. Mater.* 179:612–621; doi:10.1016/j.jhazmat.2010.03.047.
- Jang T, Lee SB, Sung CH, Lee HP, Park SW. 2010. Safe application of reclaimed water reuse for agriculture in Korea. *Paddy Water Environ.* 8:227–233; doi:10.1007/s10333-010-0203-9.
- Kalavrouziotis IK, Robolas P, Koukoulakis PH, Papadopoulou AH. 2008. Effects of municipal reclaimed wastewater on the macro- and micro-elements status of soil and of *Brassica oleracea* var. *Italica*, and *B. oleracea* var. *Gemmifera*. *Agric. Water Manag.* 95:419–426; doi:http://dx.doi.org/10.1016/j.agwat.2007.11.004.
- Kang MS, Kim SM, Park SW, Lee JJ, Yoo KH. 2007. Assessment of reclaimed wastewater irrigation impacts on water quality, soil, and rice cultivation in paddy fields. *J. Environ. Sci. Heal. Part A-Toxic/Hazardous Subst. Environ. Eng.* 42:439–445; doi:10.1080/10934520601187633.
- Keraita B, Drechsel P, Konradsen F. 2008. Perceptions of farmers on health risks and risk reduction measures in wastewater-irrigated urban vegetable farming in Ghana. *J. Risk Res.* 11:1047–1061; doi:10.1080/13669870802380825.
- Khai NM, Ha PQ, Oborn I. 2007. Nutrient flows in small-scale peri-urban vegetable farming systems in Southeast Asia - A case study in Hanoi. *Agric. Ecosyst. Environ.* 122:192–202;



doi:10.1016/j.agee.2007.01.003.

- Khan MU, Malik RN, Muhammad S. 2013. Human health risk from Heavy metal via food crops consumption with wastewater irrigation practices in Pakistan. *Chemosphere* 93:2230–2238; doi:10.1016/j.chemosphere.2013.07.067.
- Khan S, Aijun L, Zhang S, Hu Q, Zhu Y-G. 2008a. Accumulation of polycyclic aromatic hydrocarbons and heavy metals in lettuce grown in the soils contaminated with long-term wastewater irrigation. *J. Hazard. Mater.* 152:506–515; doi:http://dx.doi.org/10.1016/j.jhazmat.2007.07.014.
- Khan S, Cao Q, Zheng YM, Huang YZ, Zhu YG. 2008b. Health risks of heavy metals in contaminated soils and food crops irrigated with wastewater in Beijing, China. *Environ. Pollut.* 152:686–692; doi:10.1016/j.envpol.2007.06.056.
- Lente I, Keraita B, Drechsel P, Ofosu-Anim J, Brimah A. 2012. Risk Assessment of Heavy-Metal Contamination on Vegetables Grown in Long-Term Wastewater Irrigated Urban Farming Sites in Accra, Ghana. *Water Qual. Expo. Heal.* 4:179–186; doi:10.1007/s12403-012-0077-8.
- Lim K-Y, Jiang SC. 2013. Reevaluation of health risk benchmark for sustainable water practice through risk analysis of rooftop-harvested rainwater. *Water Res.* 47:7273–7286; doi:http://dx.doi.org/10.1016/j.watres.2013.09.059.
- Mahmood A, Malik RN. 2013. Human health risk assessment of heavy metals via consumption of contaminated vegetables collected from different irrigation sources in Lahore, Pakistan. *Arab. J. Chem.*; doi:http://dx.doi.org/10.1016/j.arabjc.2013.07.002.
- Manas P, Castro E, de Las Heras J. 2009. Irrigation with treated wastewater: effects on soil, lettuce (*Lactuca sativa* L.) crop and dynamics of microorganisms. *J. Env. Sci Heal. A Tox Hazard Subst Env. Eng* 44:1261–1273; doi:10.1080/10934520903140033.
- Manios T, Papagrigroriou I, Daskalakis G, Sabathianakis I, Terzakis S, Maniadakis K, et al. 2006. Evaluation of primary and secondary treated and disinfected wastewater irrigation of tomato and cucumber plants under greenhouse conditions, regarding growth and safety considerations. *Water Environ. Res.* 78:797–804; doi:10.2175/106143006x99830.
- Mapanda F, Mangwayana EN, Nyamangara J, Giller KE. 2007. Uptake of heavy metals by vegetables irrigated using wastewater and the subsequent risks in Harare, Zimbabwe. *Phys. Chem. Earth, Parts A/B/C* 32:1399–1405; doi:http://dx.doi.org/10.1016/j.pce.2007.07.046.
- Mara DD, Sleigh PA, Blumenthal UJ, Carr RM. 2007. Health risks in wastewater irrigation: Comparing estimates from quantitative microbial risk analyses and epidemiological studies. *J. Water Health* 5:39–50; doi:10.2166/wh.2006.055.
- Melloul AA, Hassani L, Rafouk L. 2001. Salmonella contamination of vegetables irrigated with untreated wastewater. *World J. Microbiol. Biotechnol.* 17:207–209; doi:10.1023/A:1016686501953.
- Mendoza-Espinosa LG, Cabello-Pasini A, Macias-Carranza V, Daessle-Heuser W, Orozco-Borbon M V, Quintanilla-Montoya AL. 2008. The effect of reclaimed wastewater on the quality and growth of grapevines. *Water Sci. Technol.* 57:1445–1450; doi:10.2166/wst.2008.242.
- Minhas PS, Sharma N, Yadav RK, Joshi PK. 2006. Prevalence and control of pathogenic contamination in some sewage irrigated vegetable, forage and cereal grain crops. *Bioresour. Technol.* 97:1174–1178; doi:http://dx.doi.org/10.1016/j.biortech.2005.05.006.
- Mojid MA, Wyseure GCL. 2013. Implications of municipal wastewater irrigation on soil health from a study in Bangladesh. *Soil Use Manag.* 29:384–396; doi:10.1111/sum.12056.
- Mojid MA, Wyseure GCL, Biswas SK, Hossain ABMZ. 2010. Farmers' perceptions and knowledge in using wastewater for irrigation at twelve peri-urban areas and two sugar mill areas in Bangladesh. *Agric. Water Manag.* 98:79–86; doi:http://dx.doi.org/10.1016/j.agwat.2010.07.015.

- Moradmand M, Harchegani HB. 2011. Treated municipal wastewater irrigation effect on lead content and health risks of nickel in soil and pepper in Shahrekord, Iran. *Desalin. Water Treat.* 28:42–45; doi:10.5004/dwt.2011.2198.
- Mukhtar M, Ensink J, Van der Hoek W, Amerasinghe FP, Konradsen F. 2006. Importance of waste stabilization ponds and wastewater irrigation in the generation of vector mosquitoes in Pakistan. *J Med Entomol* 43: 996–1003.
- Mukhtar M, Herrel N, Amerasinghe FP, Ensink J, van der Hoek W, Konradsen F. 2003. Role of wastewater irrigation in mosquito breeding in south Punjab, Pakistan. *Southeast Asian J Trop Med Public Heal.* 34: 72–80.
- Munoz I, Tomas N, Mas J, Garcia-Reyes JF, Molina-Diaz A, Fernandez-Alba AR. 2010. Potential chemical and microbiological risks on human health from urban wastewater reuse in agriculture. Case study of wastewater effluents in Spain. *J. Environ. Sci. Heal. Part B-Pesticides Food Contam. Agric. Wastes* 45:300–309; doi:10.1080/03601231003704648.
- Mutengu S, Hoko Z, Makoni FS. 2007. An assessment of the public health hazard potential of wastewater reuse for crop production. A case of Bulawayo city, Zimbabwe. *Phys. Chem. Earth* 32:1195–1203; doi:10.1016/j.pce.2007.07.019.
- Nabulo G, Young SD, Black CR. 2010. Assessing risk to human health from tropical leafy vegetables grown on contaminated urban soils. *Sci. Total Environ.* 408:5338–5351; doi:http://dx.doi.org/10.1016/j.scitotenv.2010.06.034.
- Navarro I, Jimenez B. 2011. Evaluation of the WHO helminth eggs criteria using a QMRA approach for the safe reuse of wastewater and sludge in developing countries. *Water Sci. Technol.* 63:1499–1505; doi:10.2166/wst.2011.394.
- Njenga M, Karanja N, Magoiya J. 2011. Risks Associated with Urban Wastewater Irrigation and Production of Traditional African Vegetable (TAVs) Seeds in Nairobi, Kenya. *Acta Hort.* 911: 295–300.
- Palacios MP, Lupiola P, Tejedor MT, Del-Nero E, Pardo A, Pita L. 2001. Climatic effects on Salmonella survival in plant and soil irrigated with artificially inoculated wastewater: preliminary results. *Water Sci. Technol.* 43: 103–108.
- Palese AM, Pasquale V, Celano G, Figliuolo G, Masi S, Xiloyannis C. 2009. Irrigation of olive groves in Southern Italy with treated municipal wastewater: Effects on microbiological quality of soil and fruits. *Agric. Ecosyst. Environ.* 129:43–51; doi:http://dx.doi.org/10.1016/j.agee.2008.07.003.
- Pandey R, Shubhashish K, Pandey J. 2012. Dietary intake of pollutant aerosols via vegetables influenced by atmospheric deposition and wastewater irrigation. *Ecotoxicol. Environ. Saf.* 76:200–208; doi:http://dx.doi.org/10.1016/j.ecoenv.2011.10.004.
- Papadopoulos F, Parissopoulos G, Papadopoulos A, Zdragas I, Ntanos D, Prochaska C, et al. 2009. Assessment of Reclaimed Municipal Wastewater Application on Rice Cultivation. *Environ. Manage.* 43:135–143; doi:10.1007/s00267-008-9221-4.
- Pedrero F, Alarcón JJ. 2009. Effects of treated wastewater irrigation on lemon trees. *Desalination* 246:631–639; doi:http://dx.doi.org/10.1016/j.desal.2008.07.017.
- Pedrero F, Allende A, Gil MI, Alarcón JJ. 2012. Soil chemical properties, leaf mineral status and crop production in a lemon tree orchard irrigated with two types of wastewater. *Agric. Water Manag.* 109:54–60; doi:http://dx.doi.org/10.1016/j.agwat.2012.02.006.
- Peters D, Ngai DD. 2004. Agro-processing waste assessment and management in peri-urban Hanoi, Vietnam. *J. Sustain. Agric.* 25:69–95; doi:10.1300/J064v25n01\_07.
- Petterson SR, Ashbolt NJ. 2001. Viral risks associated with wastewater reuse: modeling virus persistence on wastewater irrigated salad crops. *Water Sci Technol* 43: 23–26.

- Petterson SR, Ashbolt NJ, Sharma A. 2001. Microbial risks from wastewater irrigation of salad crops: A screening-level risk assessment. *Water Environ. Res.* 73:667–672; doi:10.2175/106143001x143402.
- Platzer M, Caceres V, Fong N. 2004. The reuse of treated wastewater for agricultural purposes in Nicaragua; Central America. *Water Sci. Technol.* 50: 293–300.
- Qadir M, Ghafoor A, Murtaza G, MURTAZA G. 2000. Cadmium Concentration in Vegetables Grown on Urban Soils Irrigated with Untreated Municipal Sewage. *Environ. Dev. Sustain.* 2:13–21; doi:10.1023/A:1010061711331.
- Ramadan AA, Mandil H. 2009. Wastewater Irrigation and Soil Contamination Effect on Some Leafy Vegetables Grown in Syrian Aleppo City. *Asian J. Chem.* 21: 3243–3252.
- Rusan MJM, Hinnawi S, Rousan L. 2007. Long term effect of wastewater irrigation of forage crops on soil and plant quality parameters. *Desalination* 215:143–152; doi:10.1016/j.desal.2006.10.032.
- Rutkowski T, Raschid-Sally L, Buechler S. 2007. Wastewater irrigation in the developing world - Two case studies from the Kathmandu Valley in Nepal. *Agric. Water Manag.* 88:83–91; doi:10.1016/j.agwat.2006.08.012.
- Sharma RK, Agrawal M, Marshall F. 2007. Heavy metal contamination of soil and vegetables in suburban areas of Varanasi, India. *Ecotoxicol. Environ. Saf.* 66:258–266; doi:10.1016/j.ecoenv.2005.11.007.
- Shuval H, Lampert Y, Fattal B. 1997. Development of a risk assessment approach for evaluating wastewater reuse standards for agriculture. *Water Sci. Technol.* 35:15–20; doi:10.1016/s0273-1223(97)00228-x.
- Silverman AI, Akrong MO, Amoah P, Drechsel P, Nelson KL. 2013. Quantification of human norovirus GII, human adenovirus, and fecal indicator organisms in wastewater used for irrigation in Accra, Ghana. *J. Water Health* 11:473–488; doi:10.2166/wh.2013.025.
- Singh A, Sharma RK, Agrawal M, Marshall FM. 2010. Health risk assessment of heavy metals via dietary intake of foodstuffs from the wastewater irrigated site of a dry tropical area of India. *Food Chem. Toxicol.* 48:611–619; doi:http://dx.doi.org/10.1016/j.fct.2009.11.041.
- Srinivasan JT, Reddy VR. 2009. Impact of irrigation water quality on human health: A case study in India. *Ecol. Econ.* 68:2800–2807; doi:http://dx.doi.org/10.1016/j.ecolecon.2009.04.019.
- Tai YP, Lu HP, Li ZA, Zhuang P, Zou B, Xia HP, et al. 2013. Purification of contaminated paddy fields by clean water irrigation over two decades. *Environ. Geochem. Health* 35:657–666; doi:10.1007/s10653-013-9548-5.
- Tang JC, Bai XR, Zhang WJ. 2011. Cadmium Pollution and its Transfer in Agricultural Systems in the Suburbs of Tianjin, China. *Soil Sediment Contam.* 20:722–732; doi:10.1080/15320383.2011.594112.
- Wang C, Chen Y, Liu J, Wang J, Li X, Zhang Y, et al. 2013a. Health risks of thallium in contaminated arable soils and food crops irrigated with wastewater from a sulfuric acid plant in western Guangdong province, China. *Ecotoxicol. Environ. Saf* 90:76–81; doi:10.1016/j.ecoenv.2012.12.014.
- Wang N, Li HB, Long JL, Cai C, Dai JL, Zhang J, et al. 2012a. Contamination, source, and input route of polycyclic aromatic hydrocarbons in historic wastewater-irrigated agricultural soils. *J. Environ. Monit.* 14:3076–3085; doi:10.1039/c2em30650f.
- Wang QR, Cui YS, Liu XM, Dong YT, Christie P. 2003. Soil contamination and plant uptake of heavy metals at polluted sites in China. *J. Environ. Sci. Heal. Part a-Toxic/Hazardous Subst. Environ. Eng.* 38:823–838; doi:10.1081/ese-120018594.
- Wang X, Ding WG, Nan ZR, Liao Q, Wu WF. 2013b. Fraction of Cd in oasis soil and its bioavailability to commonly grown crops in Northwest China. *Environ. Earth Sci.* 70:471–479; doi:10.1007/s12665-013-2374-3.
- Wang X, Nan ZR, Ding WG, Wang SL, Wang ZW, Yang YM, et al. 2012b. Chemical Fraction of Heavy Metals in an Oasis Soil and Their Bioavailability to Cole Crops. *Arid L. Res. Manag.* 26:166–180;

doi:10.1080/15324982.2012.656177.

- Wang YC, Qiao M, Liu YX, Zhu YG. 2012c. Health risk assessment of heavy metals in soils and vegetables from wastewater irrigated area, Beijing-Tianjin city cluster, China. *J. Environ. Sci.* 24:690–698; doi:10.1016/s1001-0742(11)60833-4.
- Weldesilassie AB, Boelee E, Drechsel P, Dabbert S. 2011. Wastewater use in crop production in peri-urban areas of Addis Ababa: impacts on health in farm households. *Environ. Dev. Econ.* 16:25–49; doi:10.1017/s1355770x1000029x.
- Wu X, Ernst F, Conkle JL, Gan J. 2013. Comparative uptake and translocation of pharmaceutical and personal care products (PPCPs) by common vegetables. *Env. Int* 60:15–22; doi:10.1016/j.envint.2013.07.015.
- Yang QW, Lan CY, Wang HB, Zhuang P, Shu WS. 2006. Cadmium in soil–rice system and health risk associated with the use of untreated mining wastewater for irrigation in Lechang, China. *Agric. Water Manag.* 84:147–152; doi:http://dx.doi.org/10.1016/j.agwat.2006.01.005.
- Zhang J, Yang JC, Wang RQ, Hou H, Du XM, Fan SK, et al. 2013. Effects of pollution sources and soil properties on distribution of polycyclic aromatic hydrocarbons and risk assessment. *Sci. Total Environ.* 463:1–10; doi:10.1016/j.scitotenv.2013.05.066.
